# Supplementary material
Source: Royal Society of Chemistry journal article supplement (doi:10.1039/d6ta02192a)
Supplement: d6ta02192a1.pdf [file d6ta02192a1.pdf]

# **Synergistic Ru-Mediated Activation of CoP/Co Heterostructures on Carbon Nanofibers toward Efficient Hydrogen Evolution**

*Xiaoyang Wei<sup>ab</sup>, Zhangsen Chen<sup>bc</sup>, Xinpeng Ma<sup>a</sup>, Shuhui Sun<sup>b,\*</sup>, Chun-Gang Yuan<sup>a,\*</sup>*

*<sup>a</sup>Hebei Key Laboratory of New Energy Environmental Safety and Resource Utilization, Department of Environmental Science & Engineering, North China Electric Power University, Baoding 071000, China.*

*<sup>b</sup>Institute National de la Recherche Scientifique (INRS), Center Énergie Matériaux Télécommunications, Varennes, Québec, J3X 1P7, Canada*

*<sup>c</sup>Department of Chemical Engineering, McGill University, Montreal, Quebec, H3A 0C5, Canada*

*\*Corresponding emails: [cgyuan@ncepu.edu.cn](mailto:cgyuan@ncepu.edu.cn) (C. Y.); [shuhui.sun@inrs.ca](mailto:shuhui.sun@inrs.ca) (S. S.)*

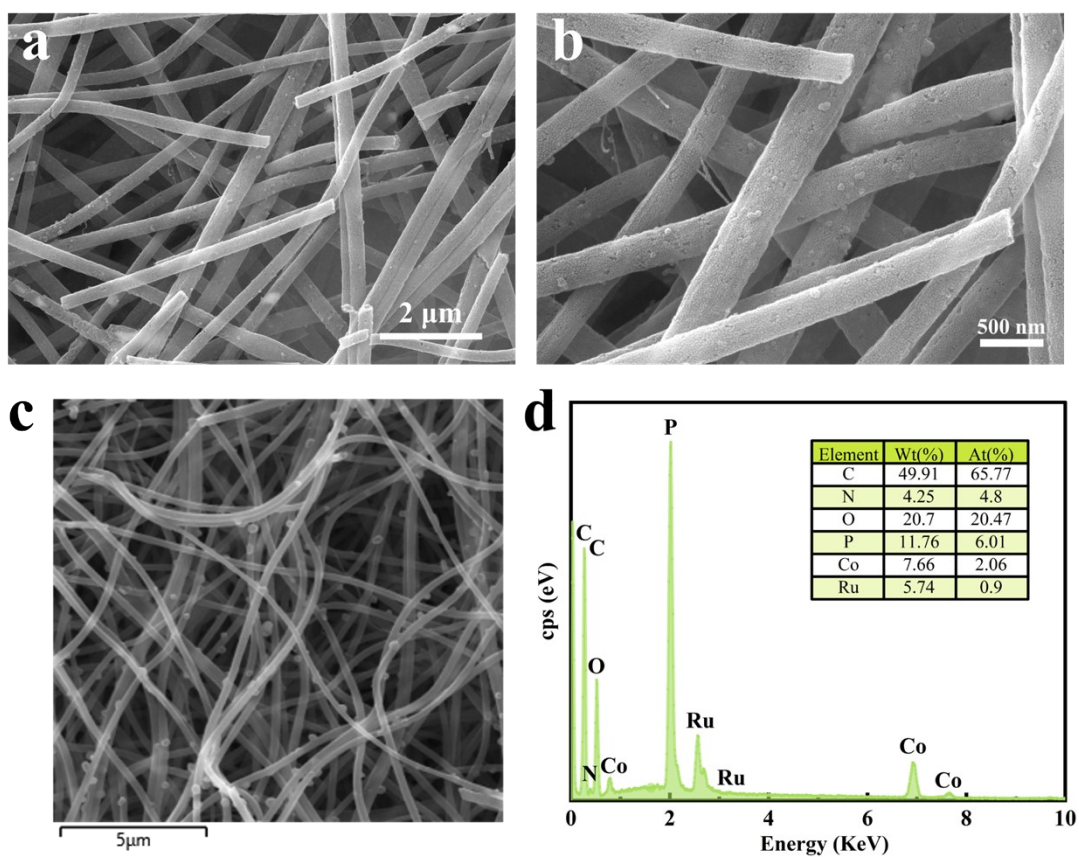

Fig. S1. (a-b) EM images of Co-NCNFs. (c) SEM image and (d) EDS of Ru-CoP/Co-NCNFs.

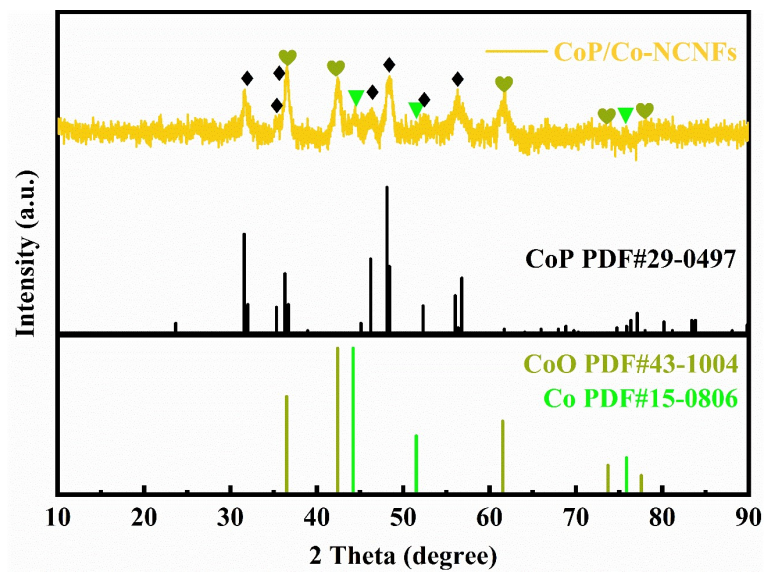

Fig. S2. XRD patterns of CoP/Co-NCNFs.

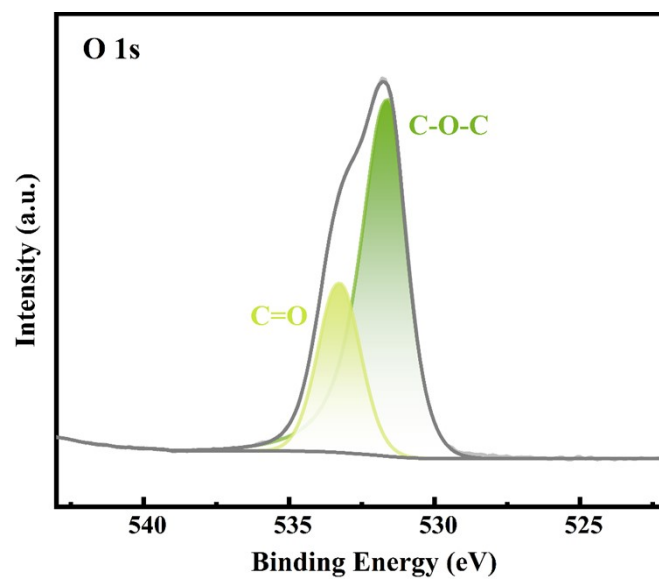

Fig. S3. XPS high-resolution O 1s spectra of the Ru-CoP/Co-NCNFs.

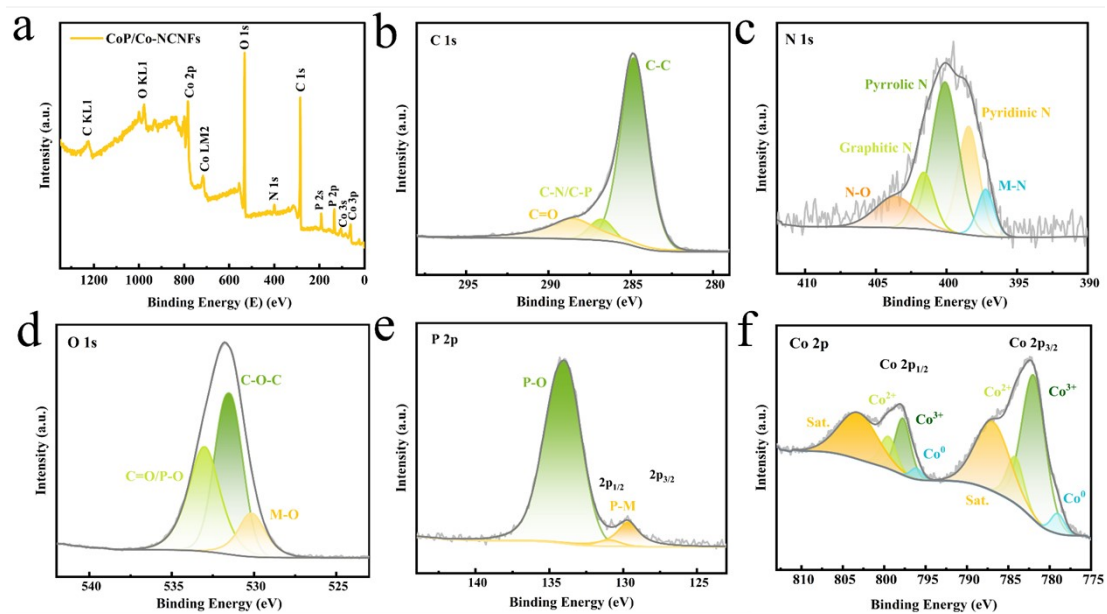

Fig. S4. (a) XPS survey spectrum and high-resolution (b) C 1s, (c) N 1s, (d) O 1s, (e) P 2p, and (f) Co 2p spectra of the CoP/Co-NCNFs.

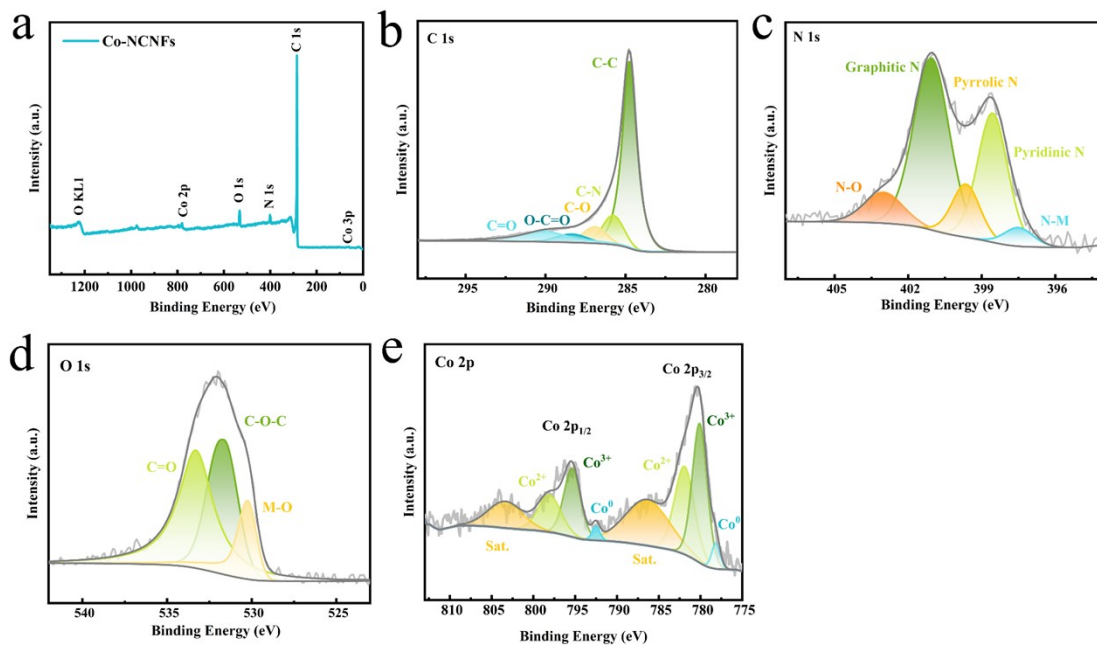

Fig. S5. (a) XPS survey spectrum and high-resolution (b) C 1s, (c) N 1s, (d) O 1s, and (e) Co 2p spectra of the Co-NCNFs.

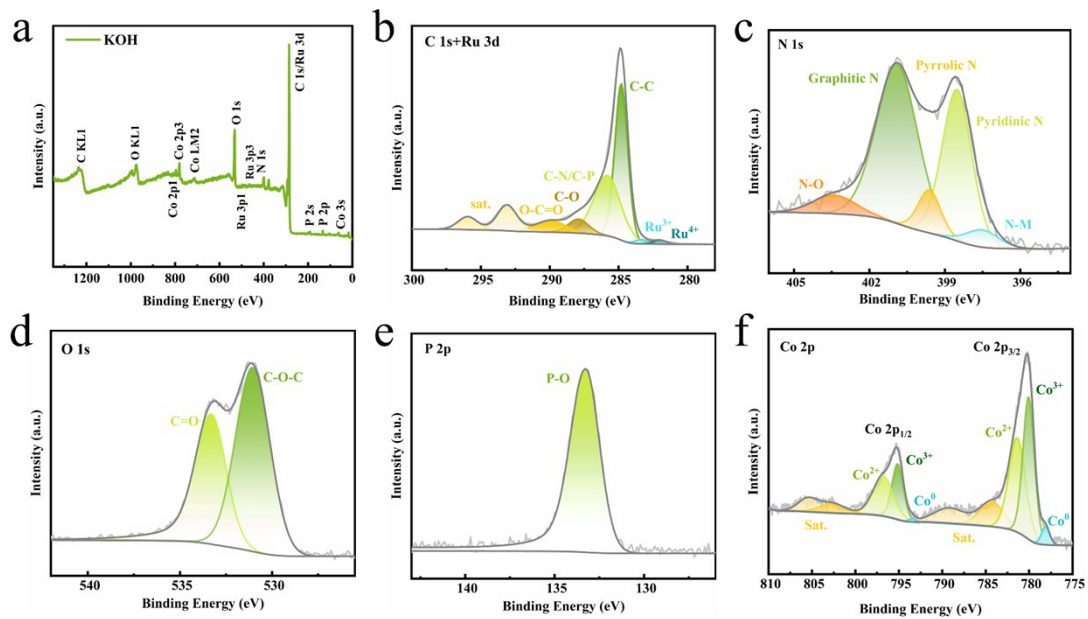

Fig. S6. (a) XPS survey spectrum and high-resolution (b) C 1s+Ru 3d, (c) N 1s, (d) O 1s, (e) P 2p, and (f) Co 2p spectra of the Ru-CoP/Co-NCNFs after chronoamperometric testing in 1.0 M KOH solution.

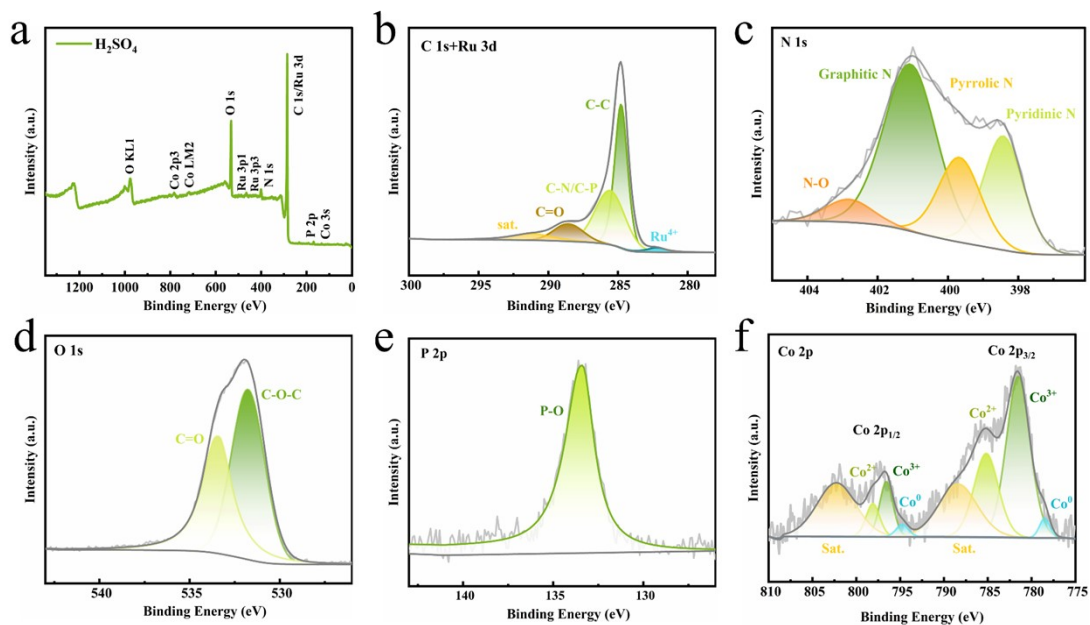

Fig. S7. (a) XPS survey spectrum and high-resolution (b) C 1s+Ru 3d, (c) N 1s, (d) O 1s, (e) P 2p, and (f) Co 2p spectra of the Ru-CoP/Co-NCNFs after chronoamperometric testing in 0.5 M  $\text{H}_2\text{SO}_4$  solution.

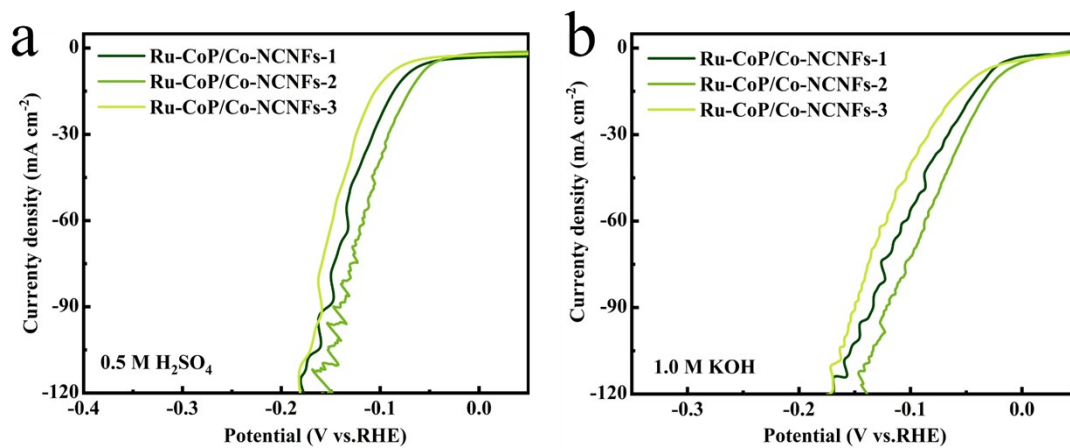

Fig. S8. Polarization curves for the different contents of Ru (a) in 0.5 M H<sub>2</sub>SO<sub>4</sub> and (b) 1.0 M KOH solution.

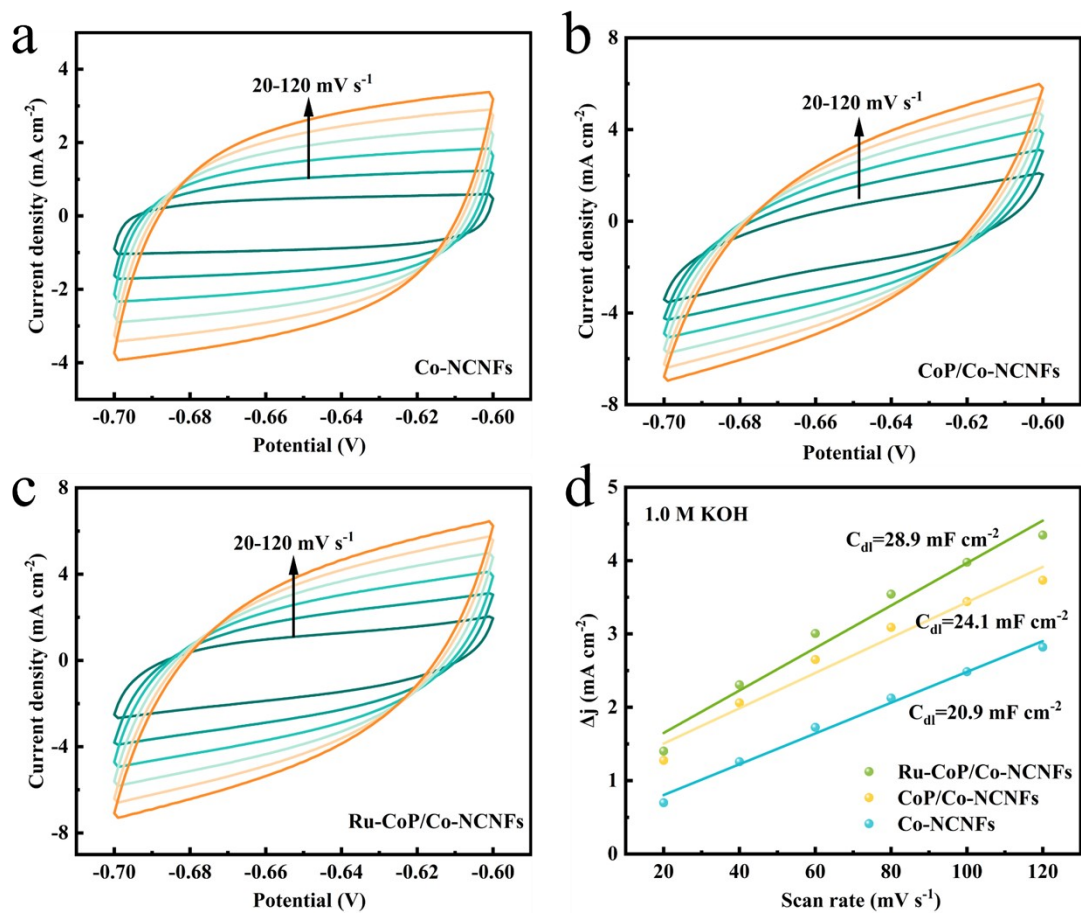

Fig. S9. (a-c) CV curves with 20 to 120  $\text{mV s}^{-1}$  scan rate and (d)  $C_{dl}$  for different samples in 1.0 M KOH solution.

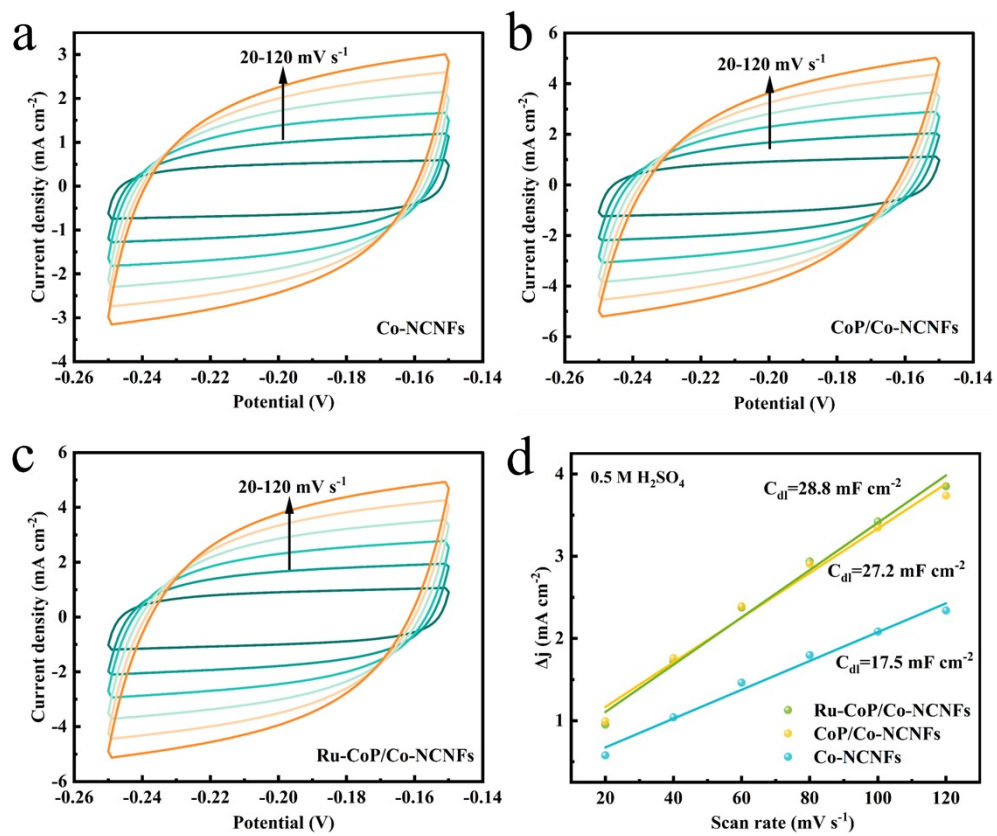

Fig. S10. (a-c) CV curves with 20 to 120 mV s<sup>-1</sup> scan rate and (d) C<sub>dl</sub> for different samples in 0.5 M H<sub>2</sub>SO<sub>4</sub> solution.

The turnover frequency (TOF) for HER was calculated by the following equation:

$$TOF = \frac{I}{Q} = \frac{|j|S}{2nF}$$

Where  $I$  (A) is the current,  $Q$  (C) is voltammetric charges,  $|j|$  ( $A \cdot cm^{-2}$ ) is the current density,  $S$  is the geometric area of the working electrode ( $1.0 \text{ cm}^2$ ),  $F$  is the Faraday constant ( $96485 \text{ C} \cdot \text{mol}^{-1}$ ), and  $n$  is the number of active sites (mol). 2 is the electron transfer numbers of HER. The number of active sites ( $n$ ) was calculated by the method previously reported. CV was used to scan a voltage range of 0-0.4V (vs. RHE) at a rate of  $50 \text{ mV s}^{-1}$  in a 1.0 M PBS solution.

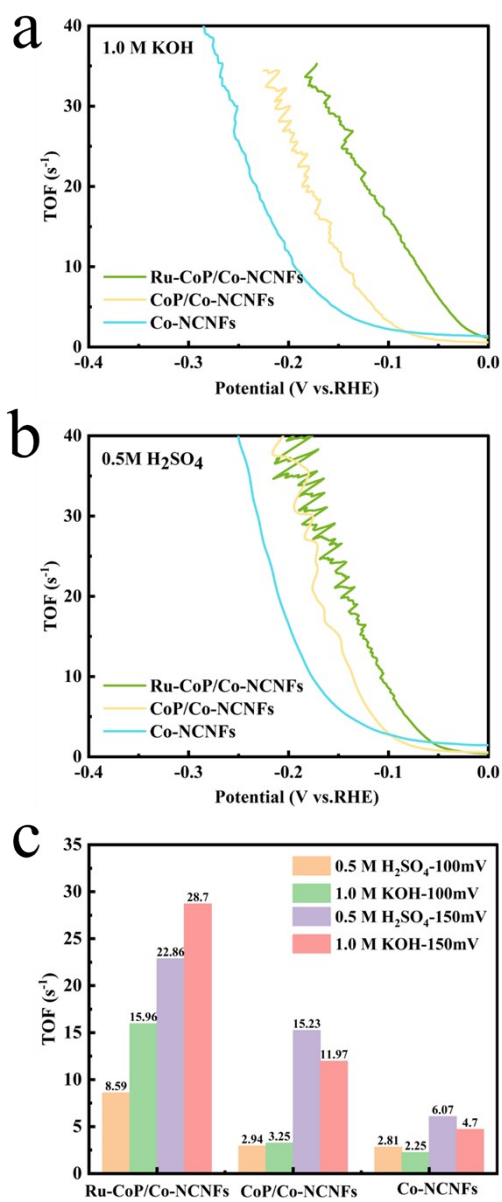

Fig. S11. TOF curves of the different samples in (a) 1.0 M KOH, (b) 0.5 M H<sub>2</sub>SO<sub>4</sub> solutions, and (c) comparison of values at different potentials.

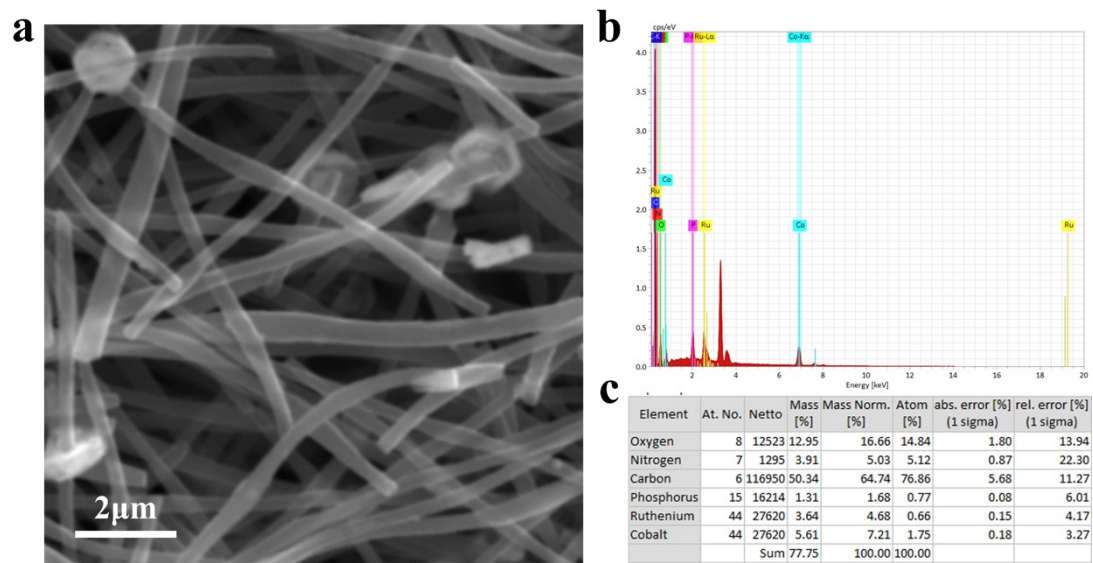

Fig. S12. (a) SEM image, (b) EDS, and (c) element content table of Ru-CoP/Co-NCNFs after stability test in 1.0 M KOH.

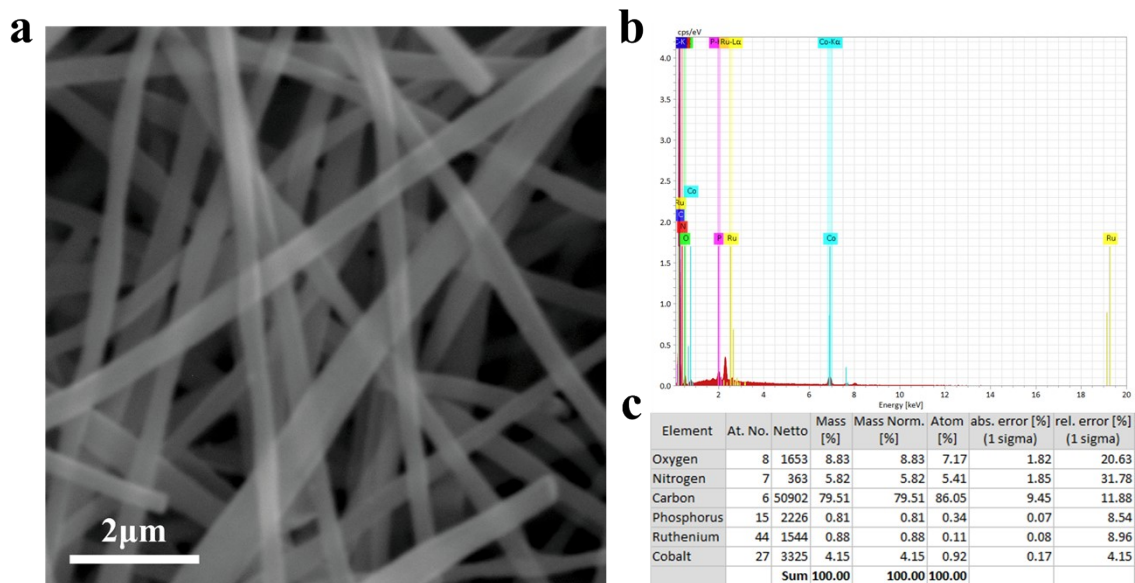

Fig. S13. (a) SEM image, (b) EDS, and (c) element content table of Ru-CoP/Co-NCNFs after stability test in 0.5 M H<sub>2</sub>SO<sub>4</sub>.

Table S1. Elemental content in different samples and after stability testing by XPS.

| Catalysts                                          | C (At %) | O (At %) | N (At %) | P (At %) | Co (At %) | Ru (At %) |
|----------------------------------------------------|----------|----------|----------|----------|-----------|-----------|
| Ru-CoP/Co-NCNFs                                    | 36.99    | 34.78    | 3.22     | 12.52    | 11.19     | 2.96      |
| CoP/Co-NCNFs                                       | 43.28    | 25.53    | 2.11     | 6.09     | 25.99     | -         |
| Co-NCNFs                                           | 88.22    | 6.85     | 3.08     | -        | 1.85      | -         |
| Ru-CoP/Co-NCNFs-<br>H <sub>2</sub> SO <sub>4</sub> | 71.82    | 17.47    | 4.08     | 1.32     | 3.54      | 1.79      |
| Ru-CoP/Co-NCNFs-<br>KOH                            | 71.52    | 17.41    | 4.06     | 1.32     | 3.51      | 1.78      |

Table S2. The value of  $j_0$  of the different samples in 0.5 M  $\text{H}_2\text{SO}_4$  and 1.0 M KOH solutions.

| Catalysts       | $j_0$<br>(mA cm <sup>-2</sup> ) | $j_0$<br>(mA cm <sup>-2</sup> ) |
|-----------------|---------------------------------|---------------------------------|
|                 | 0.5 M $\text{H}_2\text{SO}_4$   | 1.0 M KOH                       |
| Ru-CoP/Co-NCNFs | 6.52                            | 2.48                            |
| CoP/Co-NCNFs    | 4.99                            | 1.26                            |
| Co-NCNFs        | 0.96                            | 0.53                            |
| RuCoP/CP        | 1.16                            | 0.79                            |
| RuCoP/CC        | 1.14                            | 0.70                            |
| 20% Pt/C        | 6.80                            | 4.46                            |

Table S3. EIS parameters of the different samples in 0.5 M H<sub>2</sub>SO<sub>4</sub> and 1.0 M KOH solutions.

| Catalysts       | R <sub>s</sub>                       | R <sub>ct</sub> | R <sub>s</sub> | R <sub>ct</sub> |
|-----------------|--------------------------------------|-----------------|----------------|-----------------|
|                 | (Ω)                                  | (Ω)             | (Ω)            | (Ω)             |
|                 | 0.5 M H <sub>2</sub> SO <sub>4</sub> |                 | 1.0 M KOH      |                 |
| Ru-CoP/Co-NCNFs | 5.58                                 | 6.28            | 4.09           | 12.17           |
| CoP/Co-NCNFs    | 5.76                                 | 6.70            | 5.56           | 17.51           |
| Co-NCNFs        | 6.08                                 | 9.36            | 7.88           | 23.55           |

Table S4.  $C_{dl}$  and ECSA values of the different samples in 0.5 M  $H_2SO_4$  and 1.0 M KOH solutions.

| Catalysts       | $C_{dl}$          | ECSA                   | $C_{dl}$          | ECSA                   |
|-----------------|-------------------|------------------------|-------------------|------------------------|
|                 | ( $mF\ cm^{-2}$ ) | ( $cm^{-2}\ mg^{-1}$ ) | ( $mF\ cm^{-2}$ ) | ( $cm^{-2}\ mg^{-1}$ ) |
|                 | 0.5 M $H_2SO_4$   |                        | 1.0 M KOH         |                        |
| Ru-CoP/Co-NCNFs | 28.8              | 720.0                  | 28.9              | 722.5                  |
| CoP/Co-NCNFs    | 27.2              | 680.0                  | 24.1              | 602.5                  |
| Co-NCNFs        | 17.5              | 437.5                  | 20.9              | 522.5                  |

Table S5. Comparison of the catalytic performance of reported HER catalysts in 1.0 M KOH solution.

| Catalysts                                  | $\eta_{10}$<br>(mV) | Tafel<br>(mV dec <sup>-1</sup> ) | Stability                                  | Ref.      |
|--------------------------------------------|---------------------|----------------------------------|--------------------------------------------|-----------|
| Ru-CoP/Co-NCNFs                            | 21                  | 59.5                             | retaining 90% after 200 h<br>10,000 cycles | This work |
| Ru-CoP <sub>x</sub> /NF                    | 41                  | 68                               | 12h                                        | 1         |
| Ru-CoP/CC                                  | 44                  | 64                               | 60 h                                       | 2         |
| Ru@CoP/CC                                  | 48                  | 103                              | 27.8h                                      | 3         |
| CoP@NC-Ru                                  | 35                  | 72                               | 5000 cycles                                | 4         |
| Ru/B-CoP                                   | 52                  | 63.6                             | 20 h                                       | 5         |
| Ru-CoP-2.5 NAs                             | 52                  | 70.1                             | 50 h                                       | 6         |
| Ru-CoP/CC-2                                | 45                  | 98.11                            | 20 h                                       | 7         |
| Ru, Ni-CoP                                 | 45                  | 53.9                             | 40 h                                       | 8         |
| Ru-CoP/CDs                                 | 51                  | 73.4                             | 2000 cycles                                | 9         |
| MnRuPOGO-500                               | 27                  | 57.35                            | 48 h                                       | 10        |
| Ru-MoS <sub>2</sub> -Mo <sub>2</sub> C/TiN | 25                  | 58                               | 30 h                                       | 11        |

Table S6. Comparison of the catalytic performance of reported HER catalysts in 0.5 M H<sub>2</sub>SO<sub>4</sub> solution.

| Catalysts                   | $\eta_{10}$<br>(mV) | Tafel<br>(mV dec <sup>-1</sup> ) | Stability                               | Ref.      |
|-----------------------------|---------------------|----------------------------------|-----------------------------------------|-----------|
| Ru-CoP/Co-NCNFs             | 60                  | 50.6                             | retaining 90% after 200h<br>6000 cycles | This work |
| Ru-CoPx/NF                  | 73                  | 59                               | 12 h                                    | 1         |
| Ru@CoP/CC                   | 66                  | 84                               | 27.8h                                   | 3         |
| Ru-CoP/NC                   | 98                  | 56                               | -                                       | 12        |
| MnRuPOGO-500                | 109                 | 38.55                            | 60 h                                    | 10        |
| CNT-V-Fe-Ru                 | 64                  | 51                               | 20 h                                    | 13        |
| RuMo/NCN                    | 82                  | 54                               | 12 h                                    | 14        |
| NiZn@C-CoP                  | 89                  | 74                               | 24 h                                    | 15        |
| Br-Ru-RuO <sub>2</sub> /MCC | 77                  | 49                               | 12 h                                    | 16        |
| NF@CoFeP                    | 82                  | 60                               | 50 h                                    | 17        |
| CoSe <sub>2</sub> /a-CoP    | 65                  | 54                               | 50 h                                    | 18        |

## References

- 1 Shang, M.; Zhou, B.; Liu, D.; Yu, M.; Zhang, Y.; Xiao, W.; Yang, P.; Xu, G.; Wu, Z.; Wang, L. Modulated Co-P bond via ruthenium doping to facilitate spearhead-like  $\text{CoP}_x$  for overall water splitting. *Int. J. Hydrog. Energy* 2024, 49, 15-24.
- 2 Liu, S.; Li, Z.; Chang, Y.; Gyu, K.M.; Jang, H.; Cho, J.; Hou, L.; Liu, X. Substantial Impact of Built-in Electric Field and Electrode Potential on the Alkaline Hydrogen Evolution Reaction of Ru-CoP Urchin Arrays. *Angew. Chem. Int. Ed.* 2024, 63, e202400069.
- 3 Sun, D.; Qiang, P.; Yu, Y.; Zhang, J.; Huang, L.; Qu, Y.; Su, Q.; Xu, B. Electronic modulation with Ru nanoclusters decorated CoP nanowire arrays for alkaline and acidic hydrogen evolution reaction. *Int. J. Hydrog. Energy* 2024, 59, 1205-1213.
- 4 Kumar, M.M.; Aparna, C.; Nayak, A.K.; Waghmare, U.V.; Pradhan, D.; Raj, C.R. Surface Tailoring-Modulated Bifunctional Oxygen Electrocatalysis with CoP for Rechargeable Zn-Air Battery and Water Splitting. *ACS Appl. Mater. Interfaces* 2024, 16, 3542-3551.
- 5 Wang, Y.; Li, B.; Xiao, W.; Wang, X.; Fu, Y.; Li, Z.; Xu, G.; Lai, J.; Wu, Z.; Wang, L. Atomic doping modulates the electronic structure of porous cobalt phosphide nanosheets as efficient hydrogen generation electrocatalysts in wide pH range. *Chem. Eng. J.* 2023, 452, 139175.
- 6 Liu, Y.; Xu, S.; Zheng, X.; Lu, Y.; Li, D.; Jiang, D. Ru-doping modulated cobalt phosphide nanoarrays as efficient electrocatalyst for hydrogen evolution reaction. *J. Colloid Interface Sci.* 2022, 625, 457-465.
- 7 Cui, H.; Jiang, M.; Tan, G.; Xie, J.; Tan, P.; Pan, J. The In-situ Growth of Ru Modified CoP Nanoflakes on Carbon Clothes as Efficient Electrocatalysts for HER. *ChemElectroChem* 2022, 9, 287-288.
- 8 Song, Y.; Cheng, J.; Liu, J.; Ye, Q.; Gao, X.; Lu, J.; Cheng, Y. Modulating electronic structure of cobalt phosphide porous nanofiber by ruthenium and nickel dual doping for highly-efficiency overall water splitting at high current density. *Appl. Catal. B: Environ.* 2021, 298, 120488.
- 9 Song, H.; Wu, M.; Tang, Z.; Tse, J.S.; Yang, B.; Lu, S. Single Atom Ruthenium-Doped CoP/CDs Nanosheets via Splicing of Carbon-Dots for Robust Hydrogen Production. *Angew. Chem. Int. Ed.* 2021, 60, 7234-7244.
- 10 Ren, L.; Yang, D.; Yang, J. Ruthenium-manganese phosphide nanohybrid supported on graphene for efficient hydrogen evolution reaction in acid and alkaline conditions. *Int. J. Hydrog. Energy* 2022, 47, 13876-13886.
- 11 Hoa, V.H.; Tran, D.T.; Prabhakaran, S.; Kim, D.H.; Hameed, N.; Wang, H.; Kim, N.H.; Lee, J.H. Ruthenium single atoms implanted continuous  $\text{MoS}_2$ - $\text{Mo}_2\text{C}$  heterostructure for high-performance and stable water splitting. *Nano Energy* 2021, 88, 106277.
- 12 Hao, Y.; Xue, H.; Sun, J.; Guo, N.; Song, T.; Sun, J.; Wang, Q. Tuning the Electronic Structure of CoP Embedded in N-Doped Porous Carbon Nanocubes Via Ru Doping for Efficient Hydrogen Evolution. *ACS Appl. Mater. Interfaces* 2021, 13, 56035-56044.

- 13 Gao, T.; Tang, X.; Li, X.; Wu, S.; Yu, S.; Li, P.; Xiao, D.; Jin, Z. Understanding the Atomic and Defective Interface Effect on Ruthenium Clusters for the Hydrogen Evolution Reaction. *ACS Catal.* 2023, 13, 49–59.
- 14 Wang, H.; Yang, P.; Liu, D.; Yu, M.; Zhou, B.; Zhang, Y.; Xiao, Z.; Xiao, W.; Wu, Z.; Wang, L. Ultrasmall RuM (Mo, W, Cr) Decorated on Nitrogen-doped Carbon Nanosheet with Strong Metal-support Interactions for Electrocatalytic Hydrogen Generation in Wide pH Range. *J. Colloid Interface Sci.* 2023, 651, 686–695.
- 15 Luo, H.; Zhang, X.; Zhu, H.; Zhang, K.; Yang, F.; Xu, K.; Yu, S.; Guo, D. Tailoring d-band center over electron traversing effect of NiM@C-CoP (M=Zn, Mo, Ni, Co) for high-performance electrocatalysis hydrogen evolution. *J. Mater. Sci. Technol.* 2023, 166, 164–172.
- 16 Li, Q.; Gao, Y.; Liu, M.; Xiao, W.; Xu, G.; Li, Z.; Liu, F.; Wang, L.; Wu, Z. Ultrafast synthesis of halogen-doped Ru-based electrocatalysts with electronic regulation for hydrogen generation in acidic and alkaline media. *J. Colloid Interface Sci.* 2023, 646, 391–398.
- 17 Zhang, J.; Zhang, Z.; Zhang, H.; Mei, Y.; Zhang, F.; Hou, P.; Liu, C.; Cheng, H.; Li, J. Prussian-Blue-Analogue-Derived Ultrathin Co<sub>2</sub>P-Fe<sub>2</sub>P Nanosheets for Universal-pH Overall Water Splitting. *Nano Lett.* 2023, 23, 8331–8338.
- 18 Shen, S.; Wang, Z.; Lin, Z.; Song, K.; Zhang, Q.; Meng, F.; Gu, L.; Zhong, W. Crystalline-Amorphous Interfaces Coupling of CoSe<sub>2</sub>/CoP with Optimized d-Band Center and Boosted Electrocatalytic Hydrogen Evolution. *Adv. Mater.* 2022, 34, 2110631.
